# Supplementary material for: Tools for Assessing Knowledge of Back Health in Adolescents: A Systematic Review Protocol
Source: MDPI journal article supplement (doi:10.3390/healthcare10081591), 2022-08-22
Supplement: s1 [file s1]

## Supplementary Material S1.

## 47. Search Strategy.

|                             |                                                                                                                                                                                                                                                                                                                                                                                                                                                                                                                                                                                                                                                                                                                                                                                                                                                                                                                                                                                                                                                                                                                                                                                                                      |
|-----------------------------|----------------------------------------------------------------------------------------------------------------------------------------------------------------------------------------------------------------------------------------------------------------------------------------------------------------------------------------------------------------------------------------------------------------------------------------------------------------------------------------------------------------------------------------------------------------------------------------------------------------------------------------------------------------------------------------------------------------------------------------------------------------------------------------------------------------------------------------------------------------------------------------------------------------------------------------------------------------------------------------------------------------------------------------------------------------------------------------------------------------------------------------------------------------------------------------------------------------------|
| 48. .                       | 49. PubMed..                                                                                                                                                                                                                                                                                                                                                                                                                                                                                                                                                                                                                                                                                                                                                                                                                                                                                                                                                                                                                                                                                                                                                                                                         |
| 50. #1.                     | 51. (((((((((((("surveys and questionnaires"[MeSH Terms]) OR ("health care surveys"[MeSH Terms])) OR ("surveys and questionnaires"[Title/Abstract])) OR ("health care surveys"[Title/Abstract])) OR ("instrument*"[Title/Abstract])) OR ("form*"[Title/Abstract])) OR ("survey*"[Title/Abstract])) OR ("questionnaire*"[Title/Abstract])) OR ("measurement*"[Title/Abstract])) OR ("tool*"[Title/Abstract])) OR ("assessment*"[Title/Abstract])) OR ("score*"[Title/Abstract])) OR ("self report"[Title/Abstract]))..                                                                                                                                                                                                                                                                                                                                                                                                                                                                                                                                                                                                                                                                                                |
| 52. #2.                     | 53. (((((((("knowledge"[MeSH Terms]) OR ("knowledge"[Title/Abstract])) OR ("health knowledge"[Title/Abstract])) OR ("attitude*"[Title/Abstract])) OR ("practice*"[Title/Abstract])) OR ("posture knowledge"[Title/Abstract])) OR ("knowledgeability"[Title/Abstract])) OR ("knowledgeably"[Title/Abstract]))..                                                                                                                                                                                                                                                                                                                                                                                                                                                                                                                                                                                                                                                                                                                                                                                                                                                                                                       |
| 54. #3.                     | 55. (((((((((((("back"[MeSH Terms]) OR ("back pain"[MeSH Terms])) OR ("posture"[MeSH Terms])) OR ("spine"[MeSH Terms])) OR ("back"[Title/Abstract])) OR ("back pain"[Title/Abstract])) OR ("posture"[Title/Abstract])) OR ("spine"[Title/Abstract])) OR ("back posture"[Title/Abstract])) OR ("back health"[Title/Abstract])) OR ("posture habits"[Title/Abstract])) OR ("spine health"[Title/Abstract])) OR ("spine posture"[Title/Abstract])) OR ("spine care"[Title/Abstract]))..                                                                                                                                                                                                                                                                                                                                                                                                                                                                                                                                                                                                                                                                                                                                 |
| 56. #4.                     | 57. (((((((((((("adolescent"[MeSH Terms]) OR ("students"[MeSH Terms])) OR ("adolescent*"[Title/Abstract])) OR ("students*"[Title/Abstract])) OR ("teen*"[Title/Abstract])) OR ("teenager*"[Title/Abstract])) OR ("youth*"[Title/Abstract])) OR ("juvenile*"[Title/Abstract])) OR ("school enrollment"[Title/Abstract])) OR ("enrollment school"[Title/Abstract])) OR ("young*"[Title/Abstract])) OR ("minor*"[Title/Abstract]))..                                                                                                                                                                                                                                                                                                                                                                                                                                                                                                                                                                                                                                                                                                                                                                                    |
| 58. #1AND#2AND#3AND#4.<br>. | 59. (((((((((((((((("surveys and questionnaires"[MeSH Terms]) OR ("health care surveys"[MeSH Terms])) OR ("surveys and questionnaires"[Title/Abstract])) OR ("health care surveys"[Title/Abstract])) OR ("instrument*"[Title/Abstract])) OR ("form*"[Title/Abstract])) OR ("survey*"[Title/Abstract])) OR ("questionnaire*"[Title/Abstract])) OR ("measurement*"[Title/Abstract])) OR ("tool*"[Title/Abstract])) OR ("assessment*"[Title/Abstract])) OR ("score*"[Title/Abstract])) OR ("self report"[Title/Abstract])) AND (((((((("knowledge"[MeSH Terms]) OR ("knowledge"[Title/Abstract])) OR ("health knowledge"[Title/Abstract])) OR ("attitude*"[Title/Abstract])) OR ("practice*"[Title/Abstract])) OR ("posture knowledge"[Title/Abstract])) OR ("knowledgeability"[Title/Abstract])) OR ("knowledgeably"[Title/Abstract])) AND (((((((((((("back"[MeSH Terms]) OR ("back pain"[MeSH Terms])) OR ("posture"[MeSH Terms])) OR ("spine"[MeSH Terms])) OR ("back"[Title/Abstract])) OR ("back pain"[Title/Abstract])) OR ("posture"[Title/Abstract])) OR ("spine"[Title/Abstract])) OR ("back posture"[Title/Abstract])) OR ("back health"[Title/Abstract])) OR ("posture habits"[Title/Abstract])) OR ("spine |

|                       |                                                                                                                                                                                                                                                                                                                                                                                                                                                                                                                                                                                                                                                                                                                                                                                                                                                                                                                                                                                                     |
|-----------------------|-----------------------------------------------------------------------------------------------------------------------------------------------------------------------------------------------------------------------------------------------------------------------------------------------------------------------------------------------------------------------------------------------------------------------------------------------------------------------------------------------------------------------------------------------------------------------------------------------------------------------------------------------------------------------------------------------------------------------------------------------------------------------------------------------------------------------------------------------------------------------------------------------------------------------------------------------------------------------------------------------------|
|                       | health"[Title/Abstract])) OR ("spine posture"[Title/Abstract])) OR ("spine care"[Title/Abstract])) AND (((((((("adolescent"[MeSH Terms]) OR ("students"[MeSH Terms]) OR ("adolescent*"[Title/Abstract])) OR ("students*"[Title/Abstract])) OR ("teen*"[Title/Abstract])) OR ("teenager*"[Title/Abstract])) OR ("youth*"[Title/Abstract])) OR ("juvenile*"[Title/Abstract])) OR ("school enrollment"[Title/Abstract])) OR ("enrollment school"[Title/Abstract])) OR ("young*"[Title/Abstract])) OR ("minor*"[Title/Abstract]))..                                                                                                                                                                                                                                                                                                                                                                                                                                                                     |
| 60.                   | 61.<br>62. Embase                                                                                                                                                                                                                                                                                                                                                                                                                                                                                                                                                                                                                                                                                                                                                                                                                                                                                                                                                                                   |
| 63. #1                | 64. 'surveys and questionnaires':ti,ab,kw OR 'health care surveys':ti,ab,kw OR 'instrument':ti,ab,kw OR 'form':ti,ab,kw OR 'survey':ti,ab,kw OR 'questionnaire':ti,ab,kw OR 'measurement':ti,ab,kw OR 'tool':ti,ab,kw OR 'assessment':ti,ab,kw OR 'score':ti,ab,kw OR 'self report':ti,ab,kw                                                                                                                                                                                                                                                                                                                                                                                                                                                                                                                                                                                                                                                                                                        |
| 65. #2                | 66. 'knowledge':ti,ab,kw OR 'health knowledge':ti,ab,kw OR 'attitude':ti,ab,kw OR 'practice':ti,ab,kw OR 'posture knowledge':ti,ab,kw OR 'knowledgeability':ti,ab,kw OR 'knowledgeably':ti,ab,kw                                                                                                                                                                                                                                                                                                                                                                                                                                                                                                                                                                                                                                                                                                                                                                                                    |
| 67. #3                | 68. 'back':ti,ab,kw OR 'back pain':ti,ab,kw OR 'posture':ti,ab,kw OR 'spine':ti,ab,kw OR 'back posture':ti,ab,kw OR 'back health':ti,ab,kw OR 'posture habits':ti,ab,kw OR 'spine health':ti,ab,kw OR 'spine posture':ti,ab,kw OR 'spine care':ti,ab,kw                                                                                                                                                                                                                                                                                                                                                                                                                                                                                                                                                                                                                                                                                                                                             |
| 69. #4                | 70. 'adolescent':ti,ab,kw OR 'students':ti,ab,kw OR 'teen':ti,ab,kw OR 'teenager':ti,ab,kw OR 'youth':ti,ab,kw OR 'juvenile':ti,ab,kw OR 'school enrollment':ti,ab,kw OR 'enrollment school':ti,ab,kw OR 'young':ti,ab,kw OR 'minor':ti,ab,kw                                                                                                                                                                                                                                                                                                                                                                                                                                                                                                                                                                                                                                                                                                                                                       |
| 71. #1AND#2AND#3AND#4 | 72. 'surveys and questionnaires':ti,ab,kw OR 'health care surveys':ti,ab,kw OR 'instrument':ti,ab,kw OR 'form':ti,ab,kw OR 'survey':ti,ab,kw OR 'questionnaire':ti,ab,kw OR 'measurement':ti,ab,kw OR 'tool':ti,ab,kw OR 'assessment':ti,ab,kw OR 'score':ti,ab,kw OR 'self report':ti,ab,kw AND 'knowledge':ti,ab,kw OR 'health knowledge':ti,ab,kw OR 'attitude':ti,ab,kw OR 'practice':ti,ab,kw OR 'posture knowledge':ti,ab,kw OR 'knowledgeability':ti,ab,kw OR 'knowledgeably':ti,ab,kw AND 'back':ti,ab,kw OR 'back pain':ti,ab,kw OR 'posture':ti,ab,kw OR 'spine':ti,ab,kw OR 'back posture':ti,ab,kw OR 'back health':ti,ab,kw OR 'posture habits':ti,ab,kw OR 'spine health':ti,ab,kw OR 'spine posture':ti,ab,kw OR 'spine care':ti,ab,kw AND 'adolescent':ti,ab,kw OR 'students':ti,ab,kw OR 'teen':ti,ab,kw OR 'teenager':ti,ab,kw OR 'youth':ti,ab,kw OR 'juvenile':ti,ab,kw OR 'school enrollment':ti,ab,kw OR 'enrollment school':ti,ab,kw OR 'young':ti,ab,kw OR 'minor':ti,ab,kw |
| 73.                   | 74.<br>75. CINHALL                                                                                                                                                                                                                                                                                                                                                                                                                                                                                                                                                                                                                                                                                                                                                                                                                                                                                                                                                                                  |
| 76. #1                | 77. TI ( "surveys and questionnaires" ) OR TI "health care surveys" OR TI "instrument" OR TI "form" OR TI "survey" OR TI "questionnaire" OR TI "measurement" OR TI "tool" OR TI "assessment" OR TI "score" OR TI "self report" OR AB ( "surveys and questionnaires" ) OR AB "health care surveys" OR AB "instrument" OR AB "form" OR AB "survey" OR AB "questionnaire" OR AB "measurement" OR AB "tool" OR AB "assessment" OR AB "score" OR AB "self report"                                                                                                                                                                                                                                                                                                                                                                                                                                                                                                                                        |
| 78. #2                | 79. TI "knowledge" OR TI "health knowledge" OR TI "attitude" OR TI "practice" OR TI                                                                                                                                                                                                                                                                                                                                                                                                                                                                                                                                                                                                                                                                                                                                                                                                                                                                                                                 |

|                       |                                                                                                                                                                                                                                                                                                                                                                                                                                                                                                                                                                                                                                                                                                                                                                                                                                                                                                                                                                                                                                                                                                                                                                                                                                                                                                                                                                                                                                                                                                             |
|-----------------------|-------------------------------------------------------------------------------------------------------------------------------------------------------------------------------------------------------------------------------------------------------------------------------------------------------------------------------------------------------------------------------------------------------------------------------------------------------------------------------------------------------------------------------------------------------------------------------------------------------------------------------------------------------------------------------------------------------------------------------------------------------------------------------------------------------------------------------------------------------------------------------------------------------------------------------------------------------------------------------------------------------------------------------------------------------------------------------------------------------------------------------------------------------------------------------------------------------------------------------------------------------------------------------------------------------------------------------------------------------------------------------------------------------------------------------------------------------------------------------------------------------------|
|                       | "posture knowledge" OR TI "knowledgeability" OR TI knowledgeably" OR AB "knowledge" OR AB "health knowledge" OR AB "attitude" OR AB "practice" OR AB "posture knowledge" OR AB "knowledgeability" OR AB knowledgeably"                                                                                                                                                                                                                                                                                                                                                                                                                                                                                                                                                                                                                                                                                                                                                                                                                                                                                                                                                                                                                                                                                                                                                                                                                                                                                      |
| 80. #3                | 81. TI "back" OR TI "back pain" OR TI "posture" OR TI "spine" OR TI "back posture" OR TI "posture habits" OR TI "spine health" OR TI "spine posture" OR TI "spine care" OR AB "back" OR AB "back pain" OR AB "posture" OR AB "spine" OR AB "back posture" OR AB "posture habits" OR AB "spine health" OR AB "spine posture" OR AB "spine care"                                                                                                                                                                                                                                                                                                                                                                                                                                                                                                                                                                                                                                                                                                                                                                                                                                                                                                                                                                                                                                                                                                                                                              |
| 82. #4                | 83. TI "adolescent" OR TI "students" OR TI "teen" OR TI "teenager" OR TI "youth" OR TI "juvenile" OR TI "school enrollment" OR TI "enrollment school" OR TI "young" OR TI "minor" OR AB "adolescent" OR AB "students" OR AB "teen" OR AB "teenager" OR AB "youth" OR AB "juvenile" OR AB "school enrollment" OR AB "enrollment school" OR AB "young" OR AB "minor"                                                                                                                                                                                                                                                                                                                                                                                                                                                                                                                                                                                                                                                                                                                                                                                                                                                                                                                                                                                                                                                                                                                                          |
| 84. #1AND#2AND#3AND#4 | 85. (( TI ( "surveys and questionnaires" ) OR TI "health care surveys" OR TI "instrument" OR TI "form" OR TI "survey" OR TI "questionnaire" OR TI "measurement" OR TI "tool" OR TI "assessment" OR TI "score" OR TI "self report" OR AB ( "surveys and questionnaires" ) OR AB "health care surveys" OR AB "instrument" OR AB "form" OR AB "survey" OR AB "questionnaire" OR AB "measurement" OR AB "tool" OR AB "assessment" OR AB "score" OR AB "self report" ) AND ( TI "knowledge" OR TI "health knowledge" OR TI "attitude" OR TI "practice" OR TI "posture knowledge" OR TI "knowledgeability" OR TI knowledgeably" OR AB "knowledge" OR AB "health knowledge" OR AB "attitude" OR AB "practice" OR AB "posture knowledge" OR AB "knowledgeability" OR AB knowledgeably" ) AND ( TI "back" OR TI "back pain" OR TI "posture" OR TI "spine" OR TI "back posture" OR TI "posture habits" OR TI "spine health" OR TI "spine posture" OR TI "spine care" OR AB "back" OR AB "back pain" OR AB "posture" OR AB "spine" OR AB "back posture" OR AB "posture habits" OR AB "spine health" OR AB "spine posture" OR AB "spine care" ) AND ( TI "adolescent" OR TI "students" OR TI "teen" OR TI "teenager" OR TI "youth" OR TI "juvenile" OR TI "school enrollment" OR TI "enrollment school" OR TI "young" OR TI "minor" OR AB "adolescent" OR AB "students" OR AB "teen" OR AB "teenager" OR AB "youth" OR AB "juvenile" OR AB "school enrollment" OR AB "enrollment school" OR AB "young" OR AB "minor" )) |
| 86.                   | 87.<br>88. Cochrane Library                                                                                                                                                                                                                                                                                                                                                                                                                                                                                                                                                                                                                                                                                                                                                                                                                                                                                                                                                                                                                                                                                                                                                                                                                                                                                                                                                                                                                                                                                 |
| 89. #1                | 90. ("surveys and questionnaires" OR " health care surveys" OR "instrument" OR "form" OR "survey" OR "questionnaire" OR "measurement" OR "tool" OR "assessment" OR "score" OR "self report"):ti,ab,kw                                                                                                                                                                                                                                                                                                                                                                                                                                                                                                                                                                                                                                                                                                                                                                                                                                                                                                                                                                                                                                                                                                                                                                                                                                                                                                       |
| 91. #2                | 92. ("knowledge" OR "health knowledge" OR " attitude" OR " practice" OR "posture knowledge" OR " knowledgeability" OR "knowledgeably"):ti,ab,kw                                                                                                                                                                                                                                                                                                                                                                                                                                                                                                                                                                                                                                                                                                                                                                                                                                                                                                                                                                                                                                                                                                                                                                                                                                                                                                                                                             |
| 93. #3                | 94. ("back" OR "back pain" OR "posture" OR "spine" OR "back posture" OR "back health" OR "posture habits" OR "spine health" OR "spine posture" OR "spine care"):ti,ab,kw                                                                                                                                                                                                                                                                                                                                                                                                                                                                                                                                                                                                                                                                                                                                                                                                                                                                                                                                                                                                                                                                                                                                                                                                                                                                                                                                    |
| 95. #4                | 96. ("adolescent" OR "students" OR "teen" OR "teenager" OR "juvenile" OR "school enrollment" OR "enrollment school" OR "young" OR "minor"):ti,ab,kw                                                                                                                                                                                                                                                                                                                                                                                                                                                                                                                                                                                                                                                                                                                                                                                                                                                                                                                                                                                                                                                                                                                                                                                                                                                                                                                                                         |

|                       |                                                                                                                                                                                                                                                                                                                                                                                                                                                                                                                                                                                                                                                                                           |
|-----------------------|-------------------------------------------------------------------------------------------------------------------------------------------------------------------------------------------------------------------------------------------------------------------------------------------------------------------------------------------------------------------------------------------------------------------------------------------------------------------------------------------------------------------------------------------------------------------------------------------------------------------------------------------------------------------------------------------|
| 97. #1AND#2AND#3AND#4 | 98. ("surveys and questionnaires" OR "health care surveys" OR "instrument" OR "form" OR "survey" OR "questionnaire" OR "measurement" OR "tool" OR "assessment" OR "score" OR "self report"):ti,ab,kw AND ("knowledge" OR "health knowledge" OR "attitude" OR "practice" OR "posture knowledge" OR "knowledgeability" OR "knowledgeably"):ti,ab,kw AND ("back" OR "back pain" OR "posture" OR "spine" OR "back posture" OR "back health" OR "posture habits" OR "spine health" OR "spine posture" OR "spine care"):ti,ab,kw AND ("adolescent" OR "students" OR "teen" OR "teenager" OR "youth" OR "juvenile" OR "school enrollment" OR "enrollment school" OR "young" OR "minor"):ti,ab,kw |
|-----------------------|-------------------------------------------------------------------------------------------------------------------------------------------------------------------------------------------------------------------------------------------------------------------------------------------------------------------------------------------------------------------------------------------------------------------------------------------------------------------------------------------------------------------------------------------------------------------------------------------------------------------------------------------------------------------------------------------|

## PRISMA-P 2015 Checklist

This checklist has been adapted for use with protocol submissions to *Systematic Reviews* from Table 3 in Moher D et al: Preferred reporting items for systematic review and meta-analysis protocols (PRISMA-P) 2015 statement. *Systematic Reviews* 2015 4:1

| Section/topic                                                                                          | #  | Checklist item                                                                                                                                                                                  | Information reported                |                                     | Line number(s) |
|--------------------------------------------------------------------------------------------------------|----|-------------------------------------------------------------------------------------------------------------------------------------------------------------------------------------------------|-------------------------------------|-------------------------------------|----------------|
|                                                                                                        |    |                                                                                                                                                                                                 | Yes                                 | No                                  |                |
| ADMINISTRATIVE INFORMATION                                                                             |    |                                                                                                                                                                                                 |                                     |                                     |                |
| Title Tools for assessing knowledge regarding back health in adolescents: A systematic review protocol |    |                                                                                                                                                                                                 |                                     |                                     |                |
| Identification                                                                                         | 1a | Identify the report as a protocol of a systematic review                                                                                                                                        | <input checked="" type="checkbox"/> | <input type="checkbox"/>            | 3              |
| Update                                                                                                 | 1b | If the protocol is for an update of a previous systematic review, identify as such                                                                                                              | <input type="checkbox"/>            | <input checked="" type="checkbox"/> |                |
| Registration                                                                                           | 2  | If registered, provide the name of the registry (e.g., PROSPERO) and registration number in the Abstract                                                                                        | <input type="checkbox"/>            | <input checked="" type="checkbox"/> |                |
| Authors                                                                                                |    |                                                                                                                                                                                                 |                                     |                                     |                |
| Contact                                                                                                | 3a | Provide name, institutional affiliation, and e-mail address of all protocol authors; provide physical mailing address of corresponding author                                                   | <input checked="" type="checkbox"/> | <input type="checkbox"/>            | 4-11           |
| Contributions                                                                                          | 3b | Describe contributions of protocol authors and identify the guarantor of the review                                                                                                             | <input checked="" type="checkbox"/> | <input type="checkbox"/>            | 313-318        |
| Amendments                                                                                             | 4  | If the protocol represents an amendment of a previously completed or published protocol, identify as such and list changes; otherwise, state plan for documenting important protocol amendments | <input type="checkbox"/>            | <input checked="" type="checkbox"/> |                |
| Support                                                                                                |    |                                                                                                                                                                                                 |                                     |                                     |                |
| Sources                                                                                                | 5a | Indicate sources of financial or other support for the review                                                                                                                                   | <input type="checkbox"/>            | <input checked="" type="checkbox"/> |                |

| Section/topic                             | #   | Checklist item                                                                                                                                                                                                            | Information reported                |                                     | Line number(s) |
|-------------------------------------------|-----|---------------------------------------------------------------------------------------------------------------------------------------------------------------------------------------------------------------------------|-------------------------------------|-------------------------------------|----------------|
|                                           |     |                                                                                                                                                                                                                           | Yes                                 | No                                  |                |
| Sponsor                                   | 5b  | Provide name for the review funder and/or sponsor                                                                                                                                                                         | <input type="checkbox"/>            | <input checked="" type="checkbox"/> |                |
| Role of sponsor/funder                    | 5c  | Describe roles of funder(s), sponsor(s), and/or institution(s), if any, in developing the protocol                                                                                                                        | <input type="checkbox"/>            | <input checked="" type="checkbox"/> |                |
| <b>INTRODUCTION</b>                       |     |                                                                                                                                                                                                                           |                                     |                                     |                |
| <b>Rationale</b>                          | 6   | Describe the rationale for the review in the context of what is already known                                                                                                                                             | <input checked="" type="checkbox"/> | <input type="checkbox"/>            | 62-73          |
| <b>Objectives</b>                         | 7   | Provide an explicit statement of the question(s) the review will address with reference to participants, interventions, comparators, and outcomes (PICO)                                                                  | <input checked="" type="checkbox"/> | <input type="checkbox"/>            | 115-117        |
| <b>METHODS</b>                            |     |                                                                                                                                                                                                                           |                                     |                                     |                |
| <b>Eligibility criteria</b>               | 8   | Specify the study characteristics (e.g., PICO, study design, setting, time frame) and report characteristics (e.g., years considered, language, publication status) to be used as criteria for eligibility for the review | <input checked="" type="checkbox"/> | <input type="checkbox"/>            | 135-140        |
| <b>Information sources</b>                | 9   | Describe all intended information sources (e.g., electronic databases, contact with study authors, trial registers, or other grey literature sources) with planned dates of coverage                                      | <input checked="" type="checkbox"/> | <input type="checkbox"/>            | 151-159        |
| <b>Search strategy</b>                    | 10  | Present draft of search strategy to be used for at least one electronic database, including planned limits, such that it could be repeated                                                                                | <input checked="" type="checkbox"/> | <input type="checkbox"/>            | 163-164        |
| <b>STUDY RECORDS</b>                      |     |                                                                                                                                                                                                                           |                                     |                                     |                |
| Data management                           | 11a | Describe the mechanism(s) that will be used to manage records and data throughout the review                                                                                                                              | <input checked="" type="checkbox"/> | <input type="checkbox"/>            | 166-168        |
| Selection process                         | 11b | State the process that will be used for selecting studies (e.g., two independent reviewers) through each phase of the review (i.e., screening, eligibility, and inclusion in meta-analysis)                               | <input checked="" type="checkbox"/> | <input type="checkbox"/>            | 176-181        |
| Data collection process                   | 11c | Describe planned method of extracting data from reports (e.g., piloting forms, done independently, in duplicate), any processes for obtaining and confirming data from investigators                                      | <input checked="" type="checkbox"/> | <input type="checkbox"/>            | 166-173        |
| <b>Data items</b>                         | 12  | List and define all variables for which data will be sought (e.g., PICO items, funding sources), any pre-planned data assumptions and simplifications                                                                     | <input checked="" type="checkbox"/> | <input type="checkbox"/>            | 200-207        |
| <b>Outcomes and prioritization</b>        | 13  | List and define all outcomes for which data will be sought, including prioritization of main and additional outcomes, with rationale                                                                                      | <input checked="" type="checkbox"/> | <input type="checkbox"/>            | 209            |
| <b>Risk of bias in individual studies</b> | 14  | Describe anticipated methods for assessing risk of bias of individual studies, including whether this will be done at the outcome or study level, or both; state how this information will be used in data synthesis      | <input checked="" type="checkbox"/> | <input type="checkbox"/>            | 212-215        |
| <b>DATA</b>                               |     |                                                                                                                                                                                                                           |                                     |                                     |                |
| <b>Synthesis</b>                          | 15a | Describe criteria under which study data will be quantitatively synthesized                                                                                                                                               | <input checked="" type="checkbox"/> | <input type="checkbox"/>            | 243-247        |

| Section/topic                            | #   | Checklist item                                                                                                                                                                                                                              | Information reported                |                                     | Line number(s) |
|------------------------------------------|-----|---------------------------------------------------------------------------------------------------------------------------------------------------------------------------------------------------------------------------------------------|-------------------------------------|-------------------------------------|----------------|
|                                          |     |                                                                                                                                                                                                                                             | Yes                                 | No                                  |                |
|                                          | 15b | If data are appropriate for quantitative synthesis, describe planned summary measures, methods of handling data, and methods of combining data from studies, including any planned exploration of consistency (e.g., $I^2$ , Kendall's tau) | <input checked="" type="checkbox"/> | <input type="checkbox"/>            | 245-247        |
|                                          | 15c | Describe any proposed additional analyses (e.g., sensitivity or subgroup analyses, meta-regression)                                                                                                                                         | <input type="checkbox"/>            | <input checked="" type="checkbox"/> |                |
|                                          | 15d | If quantitative synthesis is not appropriate, describe the type of summary planned                                                                                                                                                          | <input type="checkbox"/>            | <input checked="" type="checkbox"/> |                |
| <b>Meta-bias(es)</b>                     | 16  | Specify any planned assessment of meta-bias(es) (e.g., publication bias across studies, selective reporting within studies)                                                                                                                 | <input type="checkbox"/>            | <input checked="" type="checkbox"/> |                |
| <b>Confidence in cumulative evidence</b> | 17  | Describe how the strength of the body of evidence will be assessed (e.g., GRADE)                                                                                                                                                            | <input checked="" type="checkbox"/> | <input type="checkbox"/>            | 259-260        |
